# Supplementary material for: False Seedbed for Agroecological Weed Management in Forage Cereal–Legume Intercrops and Monocultures in Greece
Source: MDPI journal article supplement (doi:10.3390/agronomy13010123), 2022-12-30
Supplement: s1 [file s1]

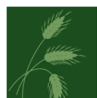

**Table S1.** The effects of year (Y), seedbed (S), and forage (F) on sterile oat density, wild mustard density, and total weed density.

| Factors                | DF <sup>1</sup> | Sterile Oat | Wild Mustard | Total Weeds |
|------------------------|-----------------|-------------|--------------|-------------|
| Year (Y)               | 1               | 0.0192      | 0.0201       | 0.0008      |
| Error (a) <sup>2</sup> | 3               |             |              |             |
| Seedbed (S)            | 2               | 0.0000      | 0.0000       | 0.0000      |
| Y × S                  | 2               | 0.0260      | 0.2534       | 0.0049      |
| Error (b) <sup>3</sup> | 12              |             |              |             |
| Forage (F)             | 4               | 0.0000      | 0.0011       | 0.0000      |
| S × F                  | 8               | 0.0622      | 0.5075       | 0.0188      |
| Y × F                  | 4               | 0.9943      | 0.2856       | 0.5489      |
| Y × S × F              | 8               | 0.6526      | 0.3519       | 0.3436      |
| Error (c) <sup>4</sup> | 72              |             |              |             |
| Total                  | 119             |             |              |             |

<sup>1</sup> Degrees of Freedom.

<sup>2</sup> Error (a); Block \* S.

<sup>3</sup> Error (b); Block \* F(S).

<sup>4</sup> Error (c); Block \* F(S) \* Y.

**Table S2.** Full presentation of all statistic parameters for the second-degree polynomial relationships ( $y = ax^2 + bx + c$ ,  $n = 12$ ) between total weed density (no.  $m^{-2}$ ; y) and days until sowing (no.; x) for each forage in (a) 2020–2021 and (b) 2021–2022 ("no." is the abbreviation of "number").

| <sup>1</sup> TWD = A * DUS <sup>2</sup> + B * DUS + C in 2020–2021 |                           |                        |                    |               |                |                   |                  |
|--------------------------------------------------------------------|---------------------------|------------------------|--------------------|---------------|----------------|-------------------|------------------|
| Forage                                                             | A                         | B                      | C                  | P-Value Model | R <sup>2</sup> | <sup>2</sup> RMSE | <sup>3</sup> MAE |
| BCM                                                                | −0.311224<br>(0.0952685)  | 2.1787<br>(1.38822)    | 45.0<br>(3.81153)  | 0.0004        | 0.787186       | 7.62306           | 5.5              |
| ARBC 1                                                             | −0.295918<br>(0.0994789)  | 1.78571<br>(1.44957)   | 40.75<br>(3.97998) | 0.0004        | 0.789365       | 7.95997           | 6.08333          |
| ARBC 2                                                             | −0.153061<br>(0.139787)   | 0.142857<br>(2.03693)  | 33.5<br>(5.59265)  | 0.0155        | 0.516096       | 11.1853           | 6.5              |
| ARBC 3                                                             | −0.0153061<br>(0.0863838) | −1.53571<br>(1.25876)  | 27.0<br>(3.45607)  | 0.0025        | 0.677968       | 6.91215           | 3.75             |
| ARM                                                                | −0.0229592<br>(0.055069)  | −1.55357<br>(0.802446) | 28.5<br>(2.20322)  | 0.0001        | 0.862758       | 4.40643           | 2.95833          |
| TWD = A * DUS <sup>2</sup> + B * DUS + C in 2021–2022              |                           |                        |                    |               |                |                   |                  |
| Forage                                                             | A                         | B                      | C                  | P-Value Model | R <sup>2</sup> | RMSE              | MAE              |
| BCM                                                                | −0.0255102<br>(0.159107)  | −2.21429<br>(2.31845)  | 64.5<br>(6.3656)   | 0.0100        | 0.560307       | 12.7312           | 9.33333          |
| ARBC 1                                                             | −0.47449<br>(0.0753307)   | 2.82143<br>(1.09769)   | 64.5<br>(3.01386)  | 0.0000        | 0.946661       | 6.02771           | 4.5              |
| ARBC 2                                                             | 0.117347<br>(0.155424)    | −5.10714<br>(2.26479)  | 55.5<br>(6.21825)  | 0.0012        | 0.724911       | 12.4365           | 8.66667          |
| ARBC 3                                                             | 0.0688776<br>(0.0719731)  | −4.33929<br>(1.04877)  | 50.75<br>(2.87953) | 0.0000        | 0.923898       | 5.75905           | 3.41667          |
| ARM                                                                | −0.114796<br>(0.123472)   | −1.05357<br>(1.7992)   | 42.75<br>(4.93992) | 0.0015        | 0.712755       | 9.87983           | 7.5              |

<sup>1</sup> TWD; Total Weed Density, DUS; Days Until Sowing.

<sup>2</sup> RMSE; Root Mean Square.

<sup>3</sup> MAE; Mean Absolute Error.

**Table S3.** The effects of years (Y), seedbed (S), and forage (F) on forage yield, biomass of berseem clover, and total weed biomass in the first harvest.

| Factors                | DF <sup>1</sup> | Forage Yield | Berseem Clover Biomass | Weed Biomass |
|------------------------|-----------------|--------------|------------------------|--------------|
| Year (Y)               | 1               | 0.0008       | 0.0078                 | 0.0007       |
| Error (a) <sup>2</sup> | 3               |              |                        |              |
| Seedbed (S)            | 2               | 0.0000       | 0.0000                 | 0.0000       |
| Y × S                  | 2               | 0.0380       | 0.3113                 | 0.0161       |
| Error (b) <sup>3</sup> | 12              |              |                        |              |
| Forage (F)             | 4               | 0.0000       | 0.0011                 | 0.0000       |
| S × F                  | 8               | 0.5082       | 0.0000                 | 0.0474       |
| Y × F                  | 4               | 0.1645       | 0.0000                 | 0.0553       |
| Y × S × F              | 8               | 0.3495       | 0.1067                 | 0.8241       |
| Error (c) <sup>4</sup> | 72              |              |                        |              |
| Total                  | 119             |              |                        |              |

<sup>1</sup> Degrees of Freedom.<sup>2</sup> Error (a); Block \* S.<sup>3</sup> Error (b); Block \* F(S).<sup>4</sup> Error (c); Block \* F(S) \* Y.

**Table S4.** Full presentation of all statistic parameters for the second-degree polynomial relationships ( $y = ax^2 + bx + c$ ,  $n = 12$ ) between forage yield ( $\text{kg ha}^{-1}$ ;  $y$ ) and days until sowing (no.;  $x$ ) for each forage in (a) 2020–2021 and (b) 2021–2022 ("no." is the abbreviation of "number").

| FY = A * DUS <sup>2</sup> + B * DUS + C in 2020–2021 |                       |                       |                      |         |                |         |         |
|------------------------------------------------------|-----------------------|-----------------------|----------------------|---------|----------------|---------|---------|
| Forage                                               | A                     | B                     | C                    | P-Value | R <sup>2</sup> | RMSE    | MAE     |
| BCM                                                  | 10.1054<br>(3.83797)  | −68.7321<br>(57.0101) | 6154.2<br>(149.908)  | 0.0011  | 0.733696       | 299.816 | 229.433 |
| ARBC 1                                               | −0.883631<br>(3.4011) | 72.2226<br>(50.5207)  | 6392.42<br>(132.844) | 0.0052  | 0.619433       | 265.688 | 203.508 |
| ARBC 2                                               | 1.11622<br>(2.80988)  | 24.9943<br>(41.7387)  | 6820.5<br>(109.752)  | 0.0149  | 0.519988       | 219.503 | 169.767 |
| ARBC 3                                               | 5.41726<br>(3.18812)  | −8.07024<br>(47.3572) | 7071.87<br>(124.526) | 0.0009  | 0.742067       | 249.051 | 175.75  |
| ARM                                                  | 5.76823<br>(2.71467)  | −18.1552<br>(40.3244) | 6864.85<br>(106.033) | 0.0004  | 0.779963       | 212.066 | 155.417 |
| FY = A * DUS <sup>2</sup> + B * DUS + C in 2021–2022 |                       |                       |                      |         |                |         |         |
| Forage                                               | A                     | B                     | C                    | P-Value | R <sup>2</sup> | RMSE    | MAE     |
| BCM                                                  | 2.29509<br>(4.4106)   | 48.667<br>(65.5161)   | 5225.92<br>(172.274) | 0.0036  | 0.649415       | 344.549 | 236.325 |
| ARBC 1                                               | 8.16473<br>(3.63014)  | −18.6509<br>(53.923)  | 5183.48<br>(141.791) | 0.0002  | 0.821093       | 283.581 | 198.375 |
| ARBC 2                                               | 8.7744<br>(3.73819)   | −55.1131<br>(55.5279) | 5662.02<br>(146.011) | 0.0016  | 0.707142       | 292.021 | 237.542 |
| ARBC 3                                               | 9.51644<br>(3.60946)  | −29.732<br>(53.6158)  | 5784.27<br>(140.983) | 0.0001  | 0.847950       | 281.965 | 198.642 |
| ARM                                                  | 7.04449<br>(4.94244)  | −36.7086<br>(73.4162) | 5915.12<br>(193.048) | 0.0181  | 0.498709       | 386.095 | 280.538 |

<sup>1</sup> TWD; Total Weed Density, DUS; Days Until Sowing.

<sup>2</sup> RMSE; Root Mean Square.

<sup>3</sup> MAE; Mean Absolute Error.

**Table S5.** The effects of years (Y), seedbed (S), and forage (F) on forage yield, biomass of berseem clover, and total weed biomass in the second harvest.

| Factors                | DF <sup>1</sup> | Forage Yield | Berseem Clover Biomass | Weed Biomass |
|------------------------|-----------------|--------------|------------------------|--------------|
| Year (Y)               | 1               | 0.6476       | 0.8026                 | 0.6992       |
| Error (a) <sup>2</sup> | 3               |              |                        |              |
| Seedbed (S)            | 2               | 0.2673       | 0.9482                 | 0.7776       |
| Y × S                  | 2               | 0.6271       | 0.9719                 | 0.7443       |
| Error (b) <sup>3</sup> | 12              |              |                        |              |
| Forage (F)             | 4               | 0.0000       | 0.0000                 | 0.0000       |
| S × F                  | 8               | 0.0329       | 0.1281                 | 0.1989       |
| Y × F                  | 4               | 0.5759       | 0.2145                 | 0.0553       |
| Y × S × F              | 8               | 0.2677       | 0.1724                 | 0.8241       |
| Error (c) <sup>4</sup> | 72              |              |                        |              |
| Total                  | 119             |              |                        |              |

<sup>1</sup> Degrees of Freedom.<sup>2</sup> Error (a); Block \* S.<sup>3</sup> Error (b); Block \* F(S).<sup>4</sup> Error (c); Block \* F(S) \* Y.**Table S6.** The effects of years (Y), seedbed (S), and forage (F) on cumulative forage yield and biomass of berseem clover from two harvests.

| Factors                | DF <sup>1</sup> | Forage Yield | Berseem Clover Biomass |
|------------------------|-----------------|--------------|------------------------|
| Year (Y)               | 1               | 0.0025       | 0.0110                 |
| Error (a) <sup>2</sup> | 3               |              |                        |
| Seedbed (S)            | 2               | 0.0000       | 0.0000                 |
| Y × S                  | 2               | 0.2438       | 0.4792                 |
| Error (b) <sup>3</sup> | 12              |              |                        |
| Forage (F)             | 4               | 0.0000       | 0.0000                 |
| S × F                  | 8               | 0.3849       | 0.0001                 |
| Y × F                  | 4               | 0.3249       | 0.0000                 |
| Y × S × F              | 8               | 0.4372       | 0.0758                 |
| Error (c) <sup>4</sup> | 72              |              |                        |
| Total                  | 119             |              |                        |

<sup>1</sup> Degrees of Freedom.<sup>2</sup> Error (a); Block \* S.<sup>3</sup> Error (b); Block \* F(S).<sup>4</sup> Error (c); Block \* F(S) \* Y.
